# Supplementary material for: Clinical features and multiomics profiles indicate coagulation and platelet dysfunction in COVID-19 viral sepsis
Source: PubMed Central journal article supplement (PMC11225851; doi:10.1016/j.isci.2024.110110), 2024-05-25
Supplement: mmc1.pdf [file mmc1.pdf]

iScience, Volume 27

## **Supplemental information**

**Clinical features and multiomics profiles  
indicate coagulation and platelet dysfunction  
in COVID-19 viral sepsis**

**Zhiqing Xiao, Minggui Lin, Ning Song, Xue Wu, Jingyu Hou, Lili Wang, XinLun Tian, Chung An, Charles S. Dela Cruz, Lokesh Sharma, and De Chang**

Supplemental information

Figure S1. Survival analysis of those with viral sepsis (VS) and viral non sepsis group (VNS), related to Table 1.

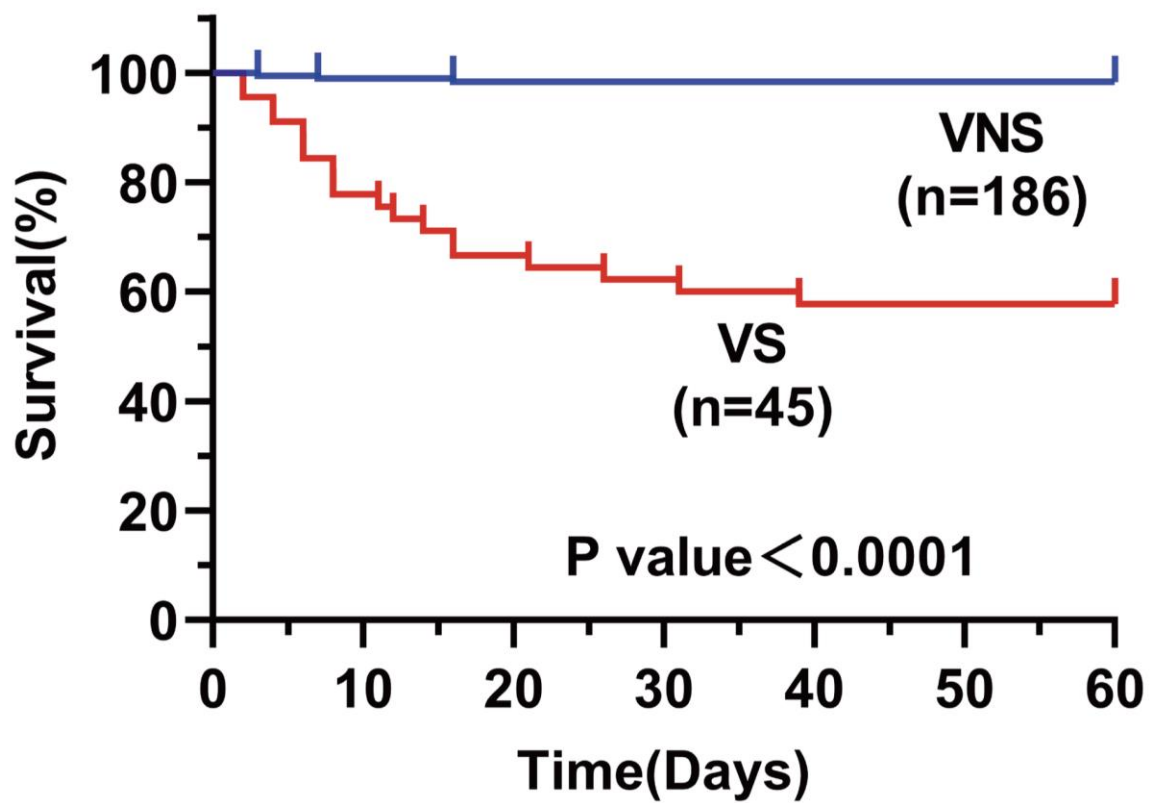

Table S1. Demographics and clinical characteristics of patients with viral sepsis (VS) and viral non sepsis (VNS) groups with COVID-19 whose sample were sent to proteomic and metabolomic analyses. Related to Figures 2 and 3.

|                                                       | All (n=37)       | VNS group (n=23)  | VS group (n=14)  | P     |
|-------------------------------------------------------|------------------|-------------------|------------------|-------|
| Age/[years, $\bar{X} \pm s$ ]                         | 78.19 $\pm$ 9.22 | 78.78 $\pm$ 10.28 | 77.21 $\pm$ 7.40 | 0.622 |
| Gender/(n, %)                                         |                  |                   |                  |       |
| Male                                                  | 21 (56.76)       | 13 (56.52)        | 8 (57.14)        | 0.970 |
| Female                                                | 16 (43.24)       | 10 (43.48)        | 6 (42.86)        |       |
| classification of COVID-19/(n, %)                     |                  |                   |                  |       |
| Severe condition                                      | 22 (59.46)       | 10 (43.48)        | 12 (85.71)       | 0.011 |
| Non-severe condition                                  | 15 (40.54)       | 13 (56.52)        | 2 (14.29)        |       |
| Underlying Conditions/(n, %)                          |                  |                   |                  |       |
| Hypertension                                          | 24 (64.86)       | 13 (56.52)        | 11 (78.57)       | 0.314 |
| Type 2 Diabetes                                       | 14 (37.84)       | 10 (43.48)        | 4 (28.57)        | 0.365 |
| Coronary Heart Disease                                | 25 (67.57)       | 16 (69.57)        | 9 (64.29)        | 1.000 |
| Cerebrovascular Disease                               | 14 (37.84)       | 10 (43.48)        | 4 (28.57)        | 0.365 |
| Smoking History/(n, %)                                | 6 (16.22)        | 3 (13.04)         | 3 (21.43)        | 0.833 |
| Alcohol History /(n, %)                               | 3 (8.11)         | 2 (8.70)          | 1 (7.14)         | 1.000 |
| Time from Symptoms to Admission/[d, $\bar{X} \pm s$ ] | 9.51 $\pm$ 4.26  | 9.43 $\pm$ 4.64   | 9.64 $\pm$ 3.71  | 0.888 |
| Length of Hospital Stay/[d, $\bar{X} \pm s$ ]         | 14.14 $\pm$ 8.39 | 13.70 $\pm$ 8.21  | 14.86 $\pm$ 8.95 | 0.689 |
| Hospitalization Cost/[10,000 RMB, Md(IQR)]            | 3.30 $\pm$ 3.13  | 2.61 $\pm$ 2.25   | 4.44 $\pm$ 4.04  | 0.085 |
| ICU Admission/[d, Md(IQR)]                            | 0 (0)            | 0 (0)             | 0 (0)            | NA    |
| ICU Length of Stay/[d, Md(IQR)]                       | 0 (0)            | 0 (0)             | 0 (0)            | NA    |
| BMI (kg·m <sup>-2</sup> , $\bar{X} \pm s$ )           | 23.61 $\pm$ 3.12 | 23.74 $\pm$ 3.50  | 23.25 $\pm$ 1.93 | 0.685 |
| Treatment/(n, %)                                      |                  |                   |                  |       |
| High-Flow Nasal Oxygen                                | 20 (54.05)       | 8 (34.78)         | 12 (85.71)       | 0.003 |
| Invasive Mechanical Ventilation                       | 3 (8.11)         | 0 (0)             | 3 (21.43)        | 0.021 |
| Non-Invasive Mechanical Ventilation                   | 1 (2.70)         | 0 (0)             | 1 (7.14)         | 1.000 |
| Complications/(n, %)                                  |                  |                   |                  |       |
| ARDS                                                  | 11 (29.73)       | 3 (13.04)         | 8 (57.14)        | 0.013 |
| Respiratory failure                                   | 11 (29.73)       | 3 (13.04)         | 8 (57.14)        | 0.013 |
| Bacterial Pneumonia                                   | 3 (8.11)         | 2 (8.70)          | 1 (7.14)         | 1.000 |
| Fungal Pneumonia                                      | 0 (0)            | 1 (4.35)          | 0 (0)            | 1.000 |
| Cardiac Injury                                        | 1 (2.70)         | 1 (4.35)          | 0 (0)            | 1.000 |
| Liver Injury                                          | 6 (16.21)        | 2 (8.70)          | 4 (28.57)        | 0.258 |
| Kidney Injury                                         | 2 (5.41)         | 0 (0)             | 2 (14.29)        | 0.137 |
| Lower Limb Thrombosis                                 | 4 (10.81)        | 2 (8.70)          | 2 (14.29)        | 1.000 |
| Cerebral Infarction                                   | 3 (8.11)         | 3 (13.04)         | 0 (0)            | 0.430 |
| Myocardial Infarction                                 | 0 (0)            | 0 (0)             | 0 (0)            | NA    |
| Prognosis /(n, %)                                     |                  |                   |                  |       |
| Survival                                              | 34 (91.89)       | 23 (100)          | 11 (78.57)       | 0.047 |
| Death                                                 | 3 (8.11)         | 0 (0)             | 3 (21.43)        |       |

NA: Not Available

Table S2. Markers to identify VS with AUC&gt;0.70, related to Figure 4.

| No. | Category   | Name                    | AUC   | P     | FC     |
|-----|------------|-------------------------|-------|-------|--------|
| 1   | Protein    | CO8G                    | 0.835 | 0.001 | 0.074  |
| 2   | Protein    | LUM                     | 0.823 | 0.001 | 0.088  |
| 3   | Protein    | CO4B                    | 0.820 | 0.002 | 0.134  |
| 4   | Protein    | RTN4                    | 0.804 | 0.007 | -0.869 |
| 5   | Protein    | KNG1                    | 0.795 | 0.009 | 0.115  |
| 6   | Protein    | CFAD                    | 0.776 | 0.010 | 0.241  |
| 7   | Protein    | CFAI                    | 0.776 | 0.022 | -0.036 |
| 8   | Protein    | VTNC                    | 0.776 | 0.013 | 0.058  |
| 9   | Protein    | CO8B                    | 0.773 | 0.012 | -0.087 |
| 10  | Protein    | CFAB                    | 0.767 | 0.004 | 0.234  |
| 11  | Protein    | CO8A                    | 0.767 | 0.007 | -0.024 |
| 12  | Protein    | MMP9                    | 0.767 | 0.008 | -1.558 |
| 13  | Protein    | PI42A                   | 0.767 | 0.003 | -3.867 |
| 14  | Protein    | EPCR                    | 0.764 | 0.007 | 0.568  |
| 15  | Protein    | ANT3                    | 0.761 | 0.007 | 0.087  |
| 16  | Protein    | CO6                     | 0.755 | 0.010 | 0.083  |
| 17  | Protein    | GIT1                    | 0.755 | 0.046 | 1.278  |
| 18  | Protein    | LCAT                    | 0.755 | 0.029 | -0.046 |
| 19  | Protein    | ATPB                    | 0.748 | 0.014 | -0.614 |
| 20  | Protein    | CO4A                    | 0.748 | 0.014 | 0.239  |
| 21  | Protein    | FHR5                    | 0.748 | 0.029 | -0.791 |
| 22  | Protein    | GRP1                    | 0.745 | 0.009 | -3.593 |
| 23  | Protein    | FIBA                    | 0.736 | 0.012 | -1.141 |
| 24  | Protein    | FIBG                    | 0.736 | 0.015 | -1.198 |
| 25  | Protein    | AMPN                    | 0.730 | 0.016 | 0.382  |
| 26  | Protein    | APOH                    | 0.727 | 0.014 | 0.274  |
| 27  | Metabolite | Glucosamine-6-phosphate | 0.727 | 0.022 | -1.420 |
| 28  | Protein    | GELS                    | 0.724 | 0.012 | 0.213  |
| 29  | Protein    | SRC8                    | 0.724 | 0.021 | -0.933 |
| 30  | Protein    | GPIX                    | 0.720 | 0.015 | -1.185 |
| 31  | Protein    | ERN1                    | 0.717 | 0.075 | -1.931 |
| 32  | Protein    | FIBB                    | 0.717 | 0.024 | -1.050 |
| 33  | Protein    | NCAM1                   | 0.717 | 0.011 | 0.072  |
| 34  | Protein    | TYB4                    | 0.714 | 0.032 | 0.818  |
| 35  | Protein    | ICAM1                   | 0.711 | 0.021 | -0.016 |
| 36  | Metabolite | Taurocholic acid        | 0.708 | 0.023 | -2.181 |
| 37  | Metabolite | Glutamine               | 0.708 | 0.050 | 0.187  |
| 38  | Protein    | CD14                    | 0.702 | 0.016 | -0.177 |
| 39  | Protein    | TBB1                    | 0.702 | 0.045 | -0.845 |
